# Supplementary material
Source: PubMed Central journal article supplement (PMC3683811)

## Supplemental Materials

**Supplemental Figure 1. Principal component analysis (PCA) of SRC metabolomics data.** Principal component analysis was performed to determine the presence of outliers within metabolites measured for each tissue (liver, heart, skeletal muscle, brain, and plasma). A 3D representation of the data that preserves pair wise similarities of distances between high-dimensional data is presented. Based on the results from this analysis, only one sample (SRC-1 WT plasma, *ad libitum* (fed)) was an outlier and was therefore removed from further analyses (arrow).

**Supplemental Figure 2. Metadata for physiological parameters of SRC mice utilized for metabolomics analyses.** **A)** Measurement of blood glucose was performed on SRC-1, SRC-2, and SRC-3 WT and KO mice (N = 5 per genotype) fed *ad libitum* (Ad Lib.) or following a 24-hour fast as indicated immediately prior to isolation of tissues used for the comprehensive metabolomics analyses. **B)** Body weight measurements of SRC-1, SRC-2, and SRC-3 WT and KO mice (N = 5 per genotype) fed *ad libitum* (Ad Lib.) or following a 24-hour fast as indicated immediately prior to isolation of tissues used for the comprehensive metabolomics analyses. **C)** Body temperature measurements from SRC-1, SRC-2, and SRC-3 WT and KO mice (N = 5 per genotype) fed *ad libitum* (Ad Lib.) or following a 24-hour fast as indicated immediately prior to isolation of tissues used for the comprehensive metabolomics analyses. All data are graphed as the mean  $\pm$  s.e.m. \*p<0.05, \*\*p<0.01, \*\*\*p<0.001 versus WT mice.

# Supplemental Figure 1

## 3D Principle Component Analysis

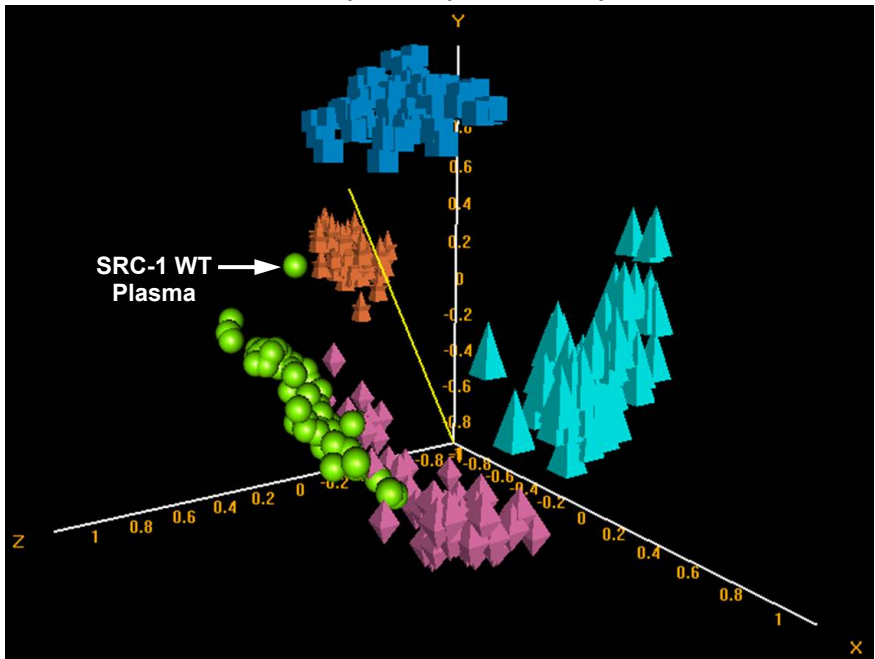

- Plasma (sphere)
- Brain (cube)
- Muscle (octahedron)
- Liver (tower)
- Heart (pentahedron)

# Supplemental Figure 2

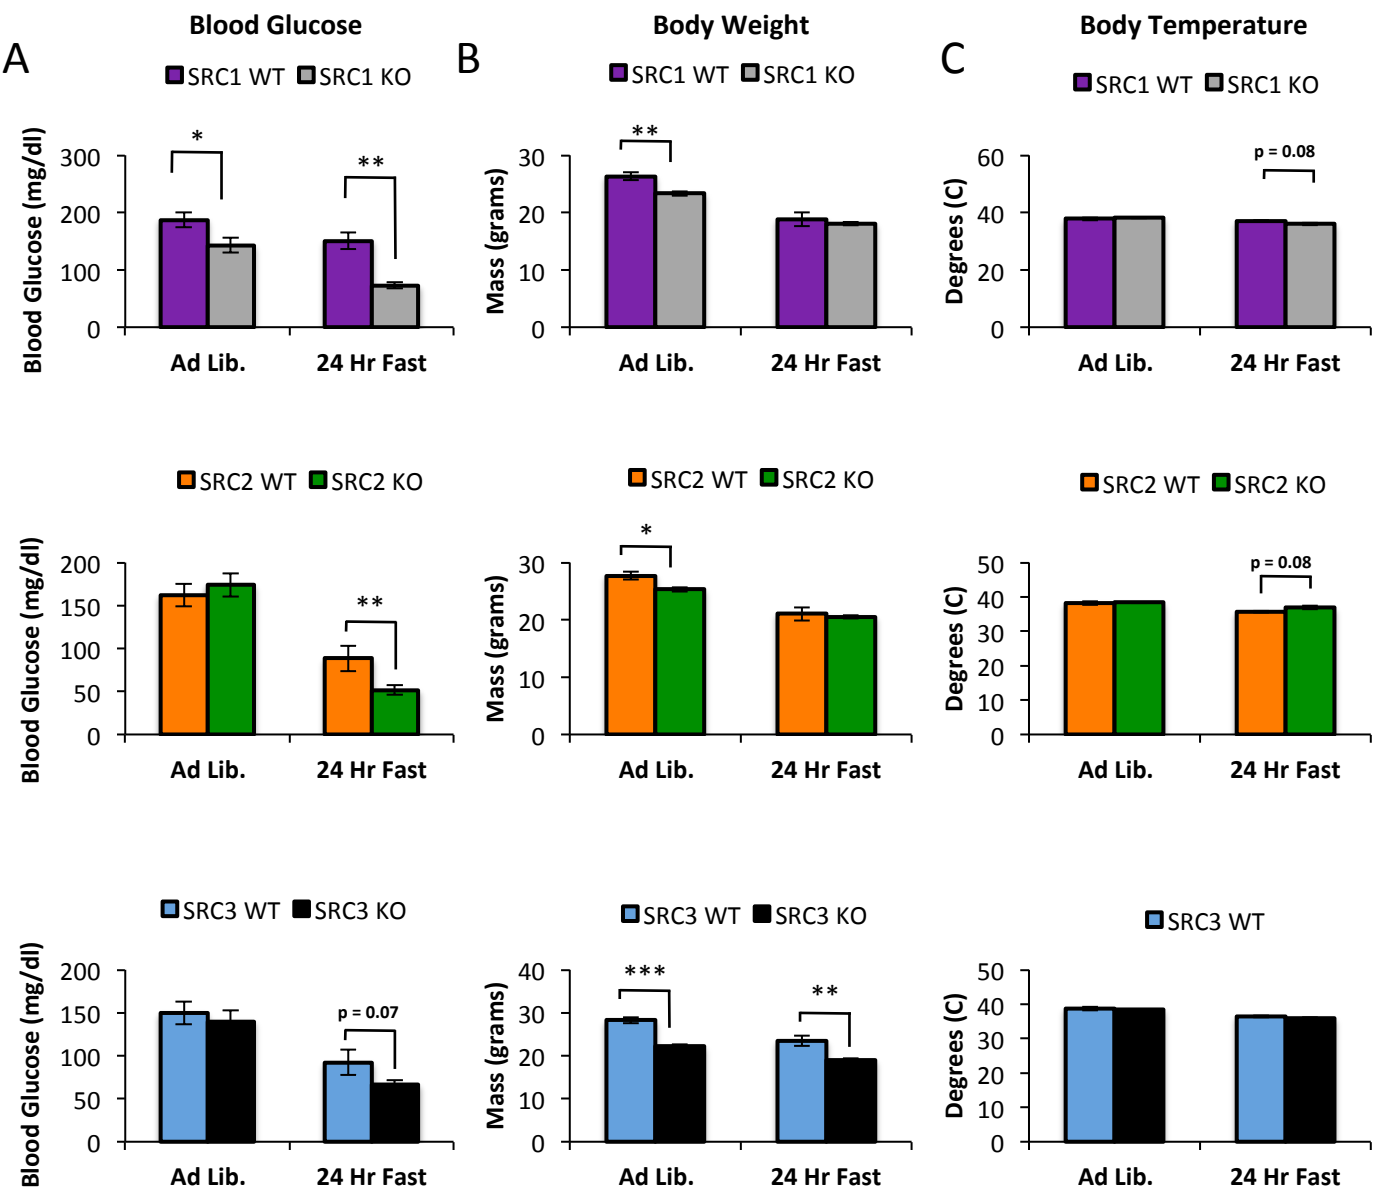

Supplement: supp_me.2012-1324_me-12-1324_Metabolomics_Supplemental_Fig_1_and_2.pdf [file supp_me.2012-1324_me-12-1324_Metabolomics_Supplemental_Fig_1_and_2.pdf]
